# Supplementary material for: Preferential use of Siglec-1 or Siglec-10 by type 1 and type 2 PRRSV strains to infect PK15S1–CD163 and PK15S10–CD163 cells
Source: PubMed Central journal article supplement (PMC6052533; doi:10.1186/s13567-018-0569-z), 2018-07-18

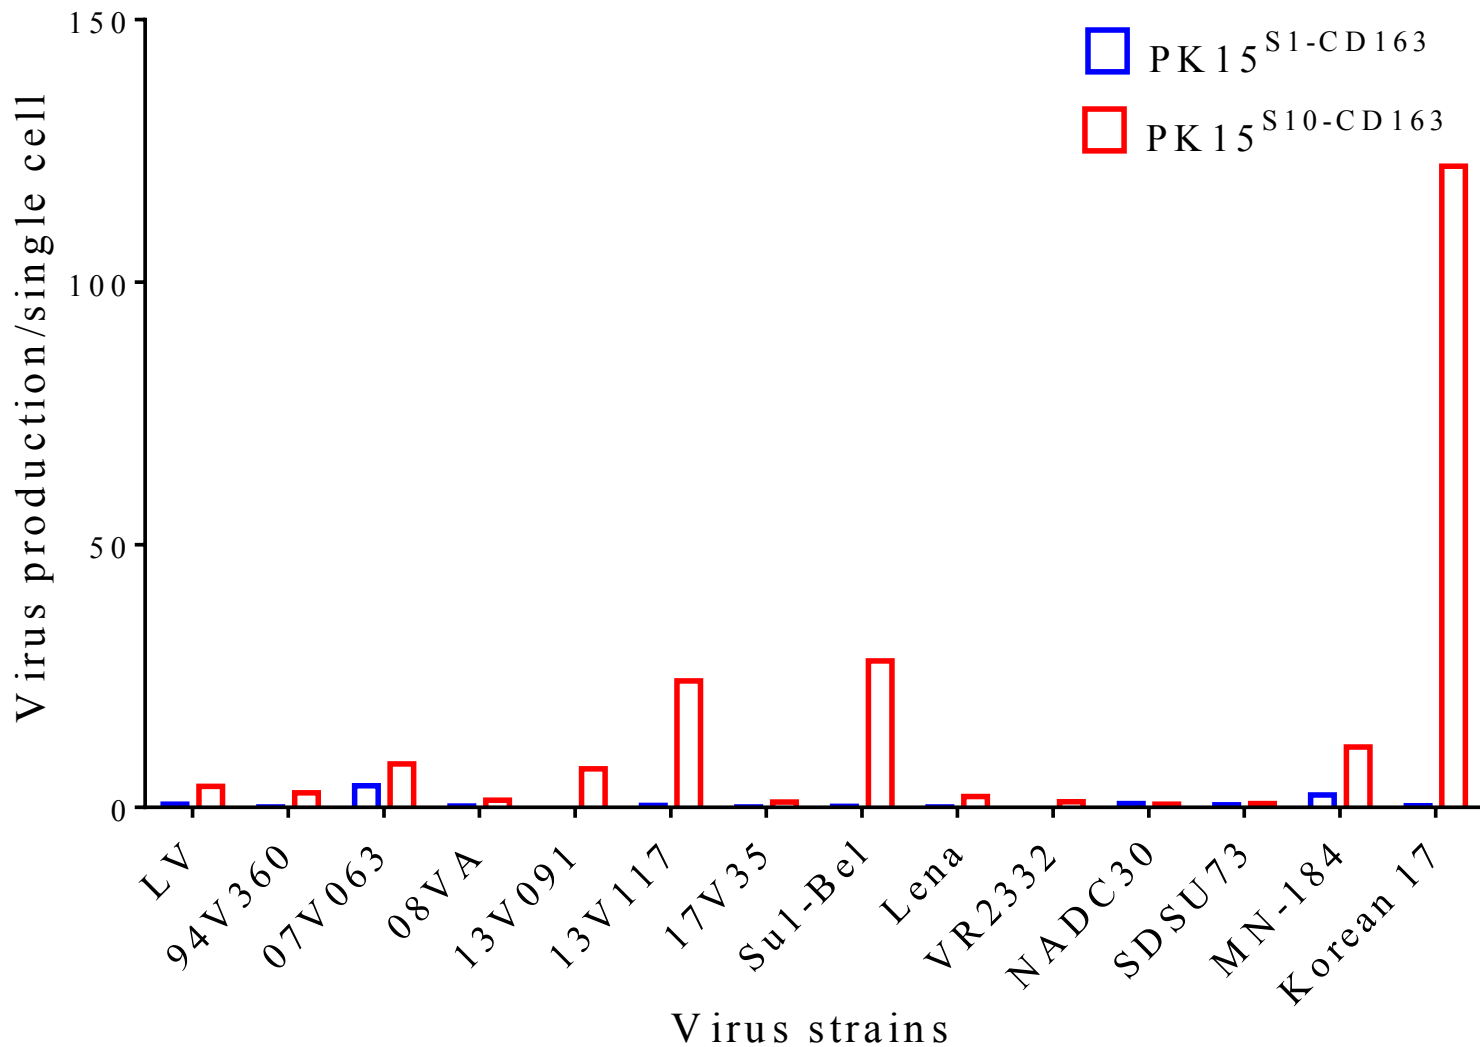

Supplement: 13567_2018_569_MOESM1_ESM.pdf [file 13567_2018_569_MOESM1_ESM.pdf]
